# Supplementary material for: Nonlinear Relationships among the Natural Environment, Health, and Sociodemographic Characteristics across US Counties
Source: Int J Environ Res Public Health. 2022 Jun 4;19(11):6898. doi: 10.3390/ijerph19116898 (PMC9180717; doi:10.3390/ijerph19116898)
Supplement: Supplementary file 1 [file ijerph-19-06898-s001.zip › ijerph-1715435-supplementary.pdf]

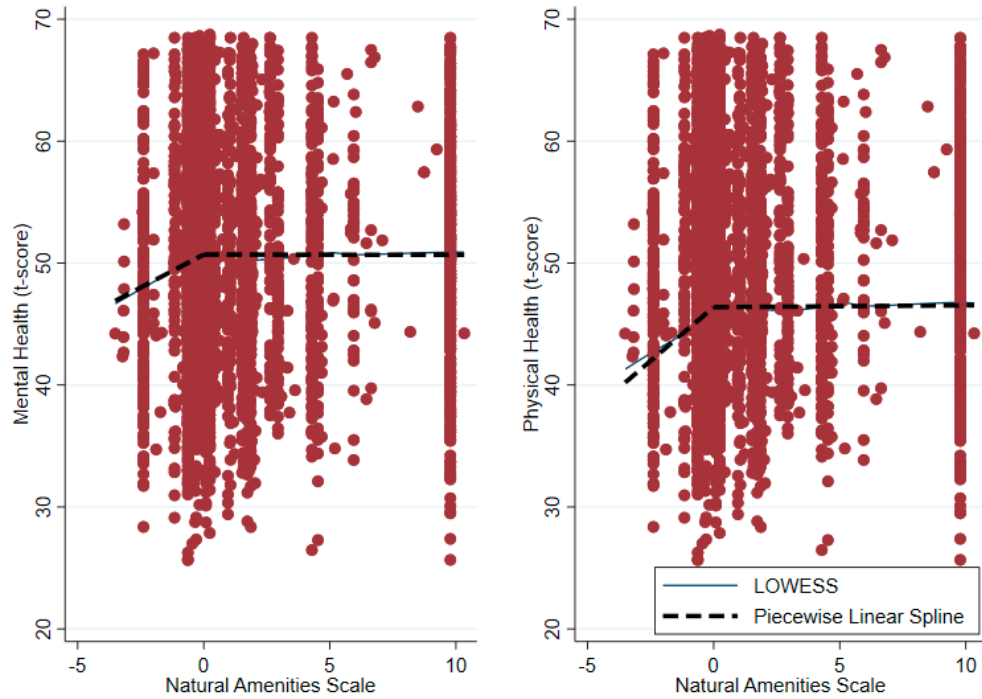

**Supplementary Figure S1.** LOWESS curves, piecewise linear splines, and data points visualizing the unadjusted relationships among NAS and mental and physical health.

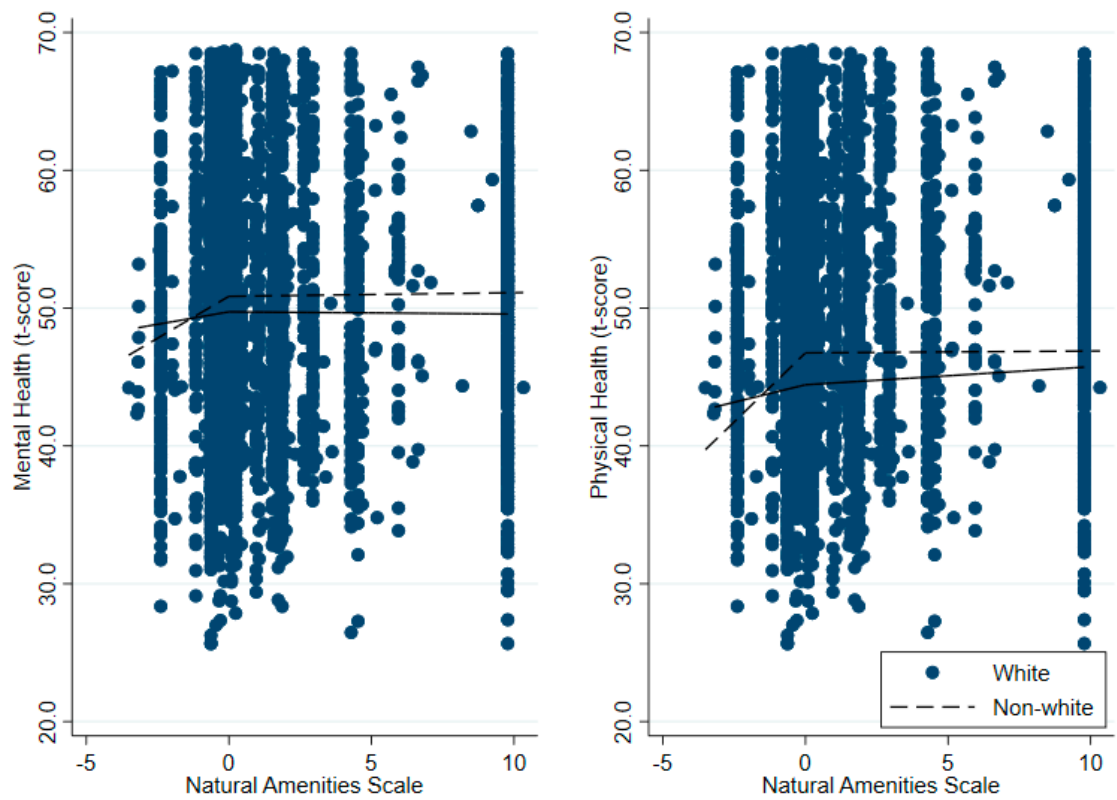

**Supplementary Figure S2.** Unadjusted piecewise linear spline models visualizing the relationships between NAS and mental and physical health for white (gray lines) and non-white (black lines) individuals.
